# Supplementary material
Source: HighWire-hosted journal article supplement (https://www.cmaj.ca/highwire/filestream/76933/field_highwire_adjunct_files/0/19-1723-1-at.pdf)
Supplement: 19-1723-1-at.pdf [file 19-1723-1-at.pdf]

## **Appendix 1 (as supplied by the authors): Supplementary material**

### **Survey Questions - Household Income**

Household members above the age of 15 were asked the following questions:

*During the year ending December 31, XXX, did this person receive any income from the sources listed below?*

- (a) Total wages and salaries, including commissions, bonuses, tips, taxable benefits, research grants, royalties, etc., before any deductions*
- (b) Self-employment: net farm income e (gross receipts minus expenses), including grants and subsidies under farm-support programs, marketing board payments, gross insurance proceeds*
- (c) Self-employment: net non-farm income from unincorporated businesses, professional practice, etc. (gross receipts minus expenses)*
- (d) Child benefits such as child tax benefits, family allowances (federal, provincial and territorial)*
- (e) Old Age Security Pension, Guaranteed Income Supplement, Allowance and Allowance for the Survivor from federal government only*
- (f) Benefits from Canada or Quebec Pension Plan*
- (g) Benefits from Employment Insurance (total benefits before tax deductions)*
- (h) Other income from government sources, such as provincial income supplements and grants, the GST/QST/HST credit, provincial tax credits, workers' compensation, veterans' pensions, welfare payments*
- (i) Dividends, interest on bonds, deposits and savings certificates, and other investment income, such as net rents from real estate, interest from mortgages*
- (j) Retirement pensions, superannuation and annuities, including those from RRSPs and RRIFs.*
- (k) Other money income, such as alimony, child support, scholarships*

## Survey Questions - Education

Prior to 2006, household members above the age of 15 were asked the following questions:

*What certificates, diplomas, or degrees has this person ever obtained?*

- (a) None*
- (b) Secondary (high) school graduate certification or equivalent*
- (c) Trades certificate or diploma*
- (d) Other non-university certificate or diploma (obtained at community college, CEGEP, technical institute, etc.)*
- (e) University certificate or diploma below bachelor level*
- (f) Bachelor's degree(s) (e.g. B.A., B.Sc., LL.B)*
- (g) University certificate or diploma above bachelor level*
- (h) Master's degree(s) (e.g. M.A., M.Sc., M.Ed.)*
- (i) Degree in medicine, dentistry, veterinary medicine, or optometry (M.D., D.D.S., D.M.D., D.V.M., O.D.)*
- (j) Earned doctorate (e.g. Ph.D, Sc.D, D.Ed.)*

From 2006 onwards, household members above the age of 15 were asked the following questions:

*Has this person completed a secondary (high) school diploma or equivalent?*

*Has this person completed a Registered Apprenticeship or other trades certificate or diploma?*

*Has this person completed a college, CEGEP, or other non-university certificate or diploma?*

*Has this person completed a university degree, certificate, or diploma?*

**Supplementary Table S1: Trends in absolute socioeconomic inequalities in premature mortality in Canada (1991-2016)**

|                       | RD (per 100000) |           |           |           |           |
|-----------------------|-----------------|-----------|-----------|-----------|-----------|
|                       | 1991-1996       | 1996-2001 | 2001-2006 | 2006-2011 | 2011-2016 |
| <b>Men</b>            |                 |           |           |           |           |
| <b>Income</b>         |                 |           |           |           |           |
| Q5 (Top)              | Ref.            | Ref.      | Ref.      | Ref.      | Ref.      |
| Q4                    | 375             | 355       | 347       | 253       | 223       |
| Q3                    | 634             | 638       | 599       | 535       | 457       |
| Q2                    | 1082            | 1127      | 996       | 890       | 906       |
| Q1 (Bottom)           | 2478            | 2281      | 2177      | 2049      | 1915      |
| <b>Education</b>      |                 |           |           |           |           |
| Postsecondary Degree  | Ref.            | Ref.      | Ref.      | Ref.      | Ref.      |
| Some Postsecondary    | 759             | 740       | 670       | 748       | 700       |
| High School Degree    | 962             | 989       | 849       | 997       | 1018      |
| Less than High School | 1713            | 1725      | 1637      | 1762      | 1843      |
| <b>Women</b>          |                 |           |           |           |           |
| <b>Income</b>         |                 |           |           |           |           |
| Q5 (Top)              | Ref.            | Ref.      | Ref.      | Ref.      | Ref.      |
| Q4                    | 122             | 148       | 79        | 146       | 127       |
| Q3                    | 235             | 229       | 240       | 329       | 279       |
| Q2                    | 351             | 354       | 343       | 489       | 478       |
| Q1 (Bottom)           | 1008            | 920       | 970       | 1160      | 1085      |
| <b>Education</b>      |                 |           |           |           |           |
| Postsecondary Degree  | Ref.            | Ref.      | Ref.      | Ref.      | Ref.      |
| Some Postsecondary    | 246             | 244       | 250       | 323       | 306       |
| High School Degree    | 364             | 356       | 404       | 510       | 566       |
| Less than High School | 792             | 810       | 895       | 1140      | 1119      |

Note: RD = Risk Difference

**Supplementary Table S2: Trends in absolute socioeconomic inequalities in preventable mortality in Canada (1991-2016)**

|                       | RD (per 100000) |           |           |           |           |
|-----------------------|-----------------|-----------|-----------|-----------|-----------|
|                       | 1991-1996       | 1996-2001 | 2001-2006 | 2006-2011 | 2011-2016 |
| <b>Men</b>            |                 |           |           |           |           |
| Income                |                 |           |           |           |           |
| Q5 (Top)              | Ref.            | Ref.      | Ref.      | Ref.      | Ref.      |
| Q4                    | 175             | 193       | 185       | 144       | 72        |
| Q3                    | 350             | 342       | 336       | 306       | 245       |
| Q2                    | 631             | 621       | 562       | 512       | 488       |
| Q1 (Bottom)           | 1468            | 1327      | 1223      | 1167      | 1080      |
| Education             |                 |           |           |           |           |
| Postsecondary Degree  | Ref.            | Ref.      | Ref.      | Ref.      | Ref.      |
| Some Postsecondary    | 413             | 422       | 389       | 440       | 434       |
| High School Degree    | 526             | 586       | 485       | 566       | 573       |
| Less than High School | 1019            | 1020      | 1001      | 1060      | 1135      |
| <b>Women</b>          |                 |           |           |           |           |
| Income                |                 |           |           |           |           |
| Q5 (Top)              | Ref.            | Ref.      | Ref.      | Ref.      | Ref.      |
| Q4                    | 46              | 80        | 39        | 56        | 59        |
| Q3                    | 98              | 96        | 115       | 138       | 135       |
| Q2                    | 176             | 202       | 203       | 241       | 242       |
| Q1 (Bottom)           | 517             | 482       | 515       | 607       | 572       |
| Education             |                 |           |           |           |           |
| Postsecondary Degree  | Ref.            | Ref.      | Ref.      | Ref.      | Ref.      |
| Some Postsecondary    | 169             | 160       | 128       | 181       | 191       |
| High School Degree    | 207             | 182       | 210       | 284       | 302       |
| Less than High School | 464             | 447       | 474       | 622       | 639       |

Note: RD = Risk Difference

**Supplementary Table S3: Trends in absolute socioeconomic inequalities in amenable mortality in Canada (1991-2016)**

|                       | RD (per 100000) |           |           |           |           |
|-----------------------|-----------------|-----------|-----------|-----------|-----------|
|                       | 1991-1996       | 1996-2001 | 2001-2006 | 2006-2011 | 2011-2016 |
| <b>Men</b>            |                 |           |           |           |           |
| Income                |                 |           |           |           |           |
| Q5 (Top)              | Ref.            | Ref.      | Ref.      | Ref.      | Ref.      |
| Q4                    | 124             | 86        | 59        | 47        | 76        |
| Q3                    | 165             | 141       | 121       | 104       | 105       |
| Q2                    | 253             | 268       | 219       | 185       | 195       |
| Q1 (Bottom)           | 548             | 505       | 490       | 451       | 439       |
| Education             |                 |           |           |           |           |
| Postsecondary Degree  | Ref.            | Ref.      | Ref.      | Ref.      | Ref.      |
| Some Postsecondary    | 224             | 163       | 149       | 167       | 130       |
| High School Degree    | 269             | 219       | 194       | 233       | 217       |
| Less than High School | 402             | 375       | 358       | 369       | 353       |
| <b>Women</b>          |                 |           |           |           |           |
| Income                |                 |           |           |           |           |
| Q5 (Top)              | Ref.            | Ref.      | Ref.      | Ref.      | Ref.      |
| Q4                    | 41              | 25        | 34        | 42        | 34        |
| Q3                    | 66              | 54        | 68        | 91        | 38        |
| Q2                    | 116             | 40        | 68        | 111       | 110       |
| Q1 (Bottom)           | 285             | 208       | 240       | 285       | 261       |
| Education             |                 |           |           |           |           |
| Postsecondary Degree  | Ref.            | Ref.      | Ref.      | Ref.      | Ref.      |
| Some Postsecondary    | 48              | 42        | 53        | 65        | 55        |
| High School Degree    | 93              | 102       | 98        | 107       | 127       |
| Less than High School | 185             | 190       | 201       | 251       | 248       |

Note: RD = Risk Difference

**Supplementary Table S4: Trends in relative socioeconomic inequalities in premature mortality in Canada (1991-2016)**

|                       | 1991-1996        | 1996-2001               | 2001-2006               | 2006-2011               | 2011-2016               |
|-----------------------|------------------|-------------------------|-------------------------|-------------------------|-------------------------|
|                       | RR (95% CI)      | RR (95% CI)             | RR (95% CI)             | RR (95% CI)             | RR (95% CI)             |
| <b>Men</b>            |                  |                         |                         |                         |                         |
| Income                |                  |                         |                         |                         |                         |
| Q5 (Top)              | Ref.             | Ref.                    | Ref.                    | Ref.                    | Ref.                    |
| Q4                    | 1.18 (1.13-1.23) | 1.22 (1.17-1.27)        | <b>1.24 (1.18-1.31)</b> | <b>1.23 (1.18-1.28)</b> | <b>1.26 (1.20-1.33)</b> |
| Q3                    | 1.33 (1.28-1.38) | <b>1.43 (1.37-1.49)</b> | <b>1.46 (1.40-1.53)</b> | <b>1.47 (1.42-1.53)</b> | <b>1.49 (1.42-1.56)</b> |
| Q2                    | 1.55 (1.49-1.61) | <b>1.71 (1.65-1.78)</b> | <b>1.74 (1.67-1.82)</b> | <b>1.73 (1.67-1.80)</b> | <b>1.88 (1.80-1.97)</b> |
| Q1 (Bottom)           | 2.10 (2.02-2.17) | <b>2.36 (2.28-2.45)</b> | <b>2.52 (2.42-2.63)</b> | <b>2.62 (2.53-2.72)</b> | <b>2.79 (2.66-2.91)</b> |
| Education             |                  |                         |                         |                         |                         |
| Postsecondary Degree  | Ref.             | Ref.                    | Ref.                    | Ref.                    | Ref.                    |
| Some Postsecondary    | 1.45 (1.38-1.52) | <b>1.54 (1.47-1.61)</b> | <b>1.54 (1.47-1.61)</b> | <b>1.68 (1.62-1.74)</b> | <b>1.70 (1.63-1.78)</b> |
| High School Degree    | 1.54 (1.46-1.61) | <b>1.69 (1.61-1.77)</b> | <b>1.67 (1.59-1.76)</b> | <b>1.90 (1.83-1.97)</b> | <b>2.02 (1.93-2.11)</b> |
| Less than High School | 1.98 (1.90-2.07) | <b>2.19 (2.10-2.28)</b> | <b>2.22 (2.13-2.32)</b> | <b>2.41 (2.32-2.50)</b> | <b>2.60 (2.48-2.72)</b> |
| <b>Women</b>          |                  |                         |                         |                         |                         |
| Income                |                  |                         |                         |                         |                         |
| Q5 (Top)              | Ref.             | Ref.                    | Ref.                    | Ref.                    | Ref.                    |
| Q4                    | 1.10 (1.03-1.17) | 1.17 (1.10-1.23)        | 1.11 (1.04-1.19)        | <b>1.23 (1.16-1.29)</b> | <b>1.24 (1.17-1.33)</b> |
| Q3                    | 1.21 (1.14-1.28) | 1.28 (1.21-1.35)        | <b>1.32 (1.24-1.40)</b> | <b>1.48 (1.41-1.56)</b> | <b>1.49 (1.40-1.58)</b> |
| Q2                    | 1.31 (1.24-1.38) | <b>1.40 (1.33-1.47)</b> | <b>1.44 (1.36-1.52)</b> | <b>1.69 (1.61-1.77)</b> | <b>1.77 (1.66-1.87)</b> |
| Q1 (Bottom)           | 1.72 (1.63-1.81) | 1.80 (1.72-1.90)        | <b>1.98 (1.88-2.09)</b> | <b>2.42 (2.31-2.54)</b> | <b>2.50 (2.36-2.64)</b> |
| Education             |                  |                         |                         |                         |                         |
| Postsecondary Degree  | Ref.             | Ref.                    | Ref.                    | Ref.                    | Ref.                    |
| Some Postsecondary    | 1.28 (1.19-1.39) | 1.33 (1.24-1.42)        | 1.36 (1.27-1.44)        | <b>1.47 (1.40-1.54)</b> | <b>1.47 (1.39-1.55)</b> |
| High School Degree    | 1.39 (1.29-1.50) | 1.44 (1.35-1.55)        | <b>1.53 (1.43-1.63)</b> | <b>1.71 (1.63-1.80)</b> | <b>1.82 (1.72-1.92)</b> |
| Less than High School | 1.82 (1.69-1.95) | 1.94 (1.82-2.08)        | <b>2.06 (1.94-2.19)</b> | <b>2.28 (2.17-2.39)</b> | <b>2.31 (2.18-2.44)</b> |

Note: RR = Risk Ratio; Bold signifies a statistically significant estimate compared to the 1991-1996 period.

**Supplementary Table S5: Trends in relative socioeconomic inequalities in preventable mortality in Canada (1991-2016)**

|                       | 1991-1996        | 1996-2001               | 2001-2006               | 2006-2011               | 2011-2016               |
|-----------------------|------------------|-------------------------|-------------------------|-------------------------|-------------------------|
|                       | RR (95% CI)      | RR (95% CI)             | RR (95% CI)             | RR (95% CI)             | RR (95% CI)             |
| <b>Men</b>            |                  |                         |                         |                         |                         |
| Income                |                  |                         |                         |                         |                         |
| Q5 (Top)              | Ref.             | Ref.                    | Ref.                    | Ref.                    | Ref.                    |
| Q4                    | 1.18 (1.11-1.25) | 1.26 (1.18-1.34)        | 1.26 (1.18-1.36)        | <b>1.29 (1.22-1.37)</b> | <b>1.22 (1.13-1.31)</b> |
| Q3                    | 1.38 (1.30-1.46) | <b>1.51 (1.42-1.60)</b> | <b>1.54 (1.44-1.65)</b> | <b>1.58 (1.49-1.67)</b> | <b>1.56 (1.45-1.67)</b> |
| Q2                    | 1.66 (1.57-1.75) | <b>1.88 (1.77-1.98)</b> | <b>1.89 (1.77-2.01)</b> | <b>1.90 (1.80-2.01)</b> | <b>2.02 (1.88-2.16)</b> |
| Q1 (Bottom)           | 2.37 (2.25-2.49) | <b>2.75 (2.61-2.91)</b> | <b>2.86 (2.69-3.04)</b> | <b>2.98 (2.83-3.14)</b> | <b>3.10 (2.91-3.31)</b> |
| Education             |                  |                         |                         |                         |                         |
| Postsecondary Degree  | Ref.             | Ref.                    | Ref.                    | Ref.                    | Ref.                    |
| Some Postsecondary    | 1.48 (1.38-1.58) | <b>1.68 (1.57-1.80)</b> | <b>1.72 (1.61-1.84)</b> | <b>1.87 (1.77-1.97)</b> | <b>1.97 (1.85-2.10)</b> |
| High School Degree    | 1.59 (1.48-1.70) | <b>1.92 (1.78-2.06)</b> | <b>1.89 (1.75-2.03)</b> | <b>2.11 (2.00-2.24)</b> | <b>2.27 (2.13-2.43)</b> |
| Less than High School | 2.17 (2.04-2.31) | <b>2.60 (2.45-2.77)</b> | <b>2.75 (2.57-2.94)</b> | <b>2.88 (2.72-3.04)</b> | <b>3.26 (3.05-3.49)</b> |
| <b>Women</b>          |                  |                         |                         |                         |                         |
| Income                |                  |                         |                         |                         |                         |
| Q5 (Top)              | Ref.             | Ref.                    | Ref.                    | Ref.                    | Ref.                    |
| Q4                    | 1.11 (1.00-1.24) | <b>1.26 (1.14-1.38)</b> | 1.19 (1.07-1.33)        | <b>1.27 (1.16-1.40)</b> | <b>1.32 (1.18-1.46)</b> |
| Q3                    | 1.28 (1.15-1.41) | 1.36 (1.24-1.49)        | <b>1.48 (1.34-1.65)</b> | <b>1.61 (1.48-1.75)</b> | <b>1.67 (1.51-1.85)</b> |
| Q2                    | 1.46 (1.33-1.60) | <b>1.67 (1.53-1.82)</b> | <b>1.79 (1.63-1.97)</b> | <b>1.98 (1.82-2.15)</b> | <b>2.11 (1.91-2.32)</b> |
| Q1 (Bottom)           | 2.12 (1.95-2.32) | 2.28 (2.10-2.48)        | <b>2.62 (2.40-2.88)</b> | <b>3.14 (2.90-3.40)</b> | <b>3.28 (2.99-3.61)</b> |
| Education             |                  |                         |                         |                         |                         |
| Postsecondary Degree  | Ref.             | Ref.                    | Ref.                    | Ref.                    | Ref.                    |
| Some Postsecondary    | 1.59 (1.38-1.83) | 1.66 (1.47-1.88)        | 1.57 (1.40-1.75)        | <b>1.84 (1.69-2.00)</b> | <b>1.89 (1.72-2.07)</b> |
| High School Degree    | 1.70 (1.47-1.96) | 1.75 (1.55-1.99)        | 1.86 (1.66-2.09)        | <b>2.27 (2.09-2.47)</b> | <b>2.35 (2.13-2.59)</b> |
| Less than High School | 2.57 (2.25-2.93) | 2.73 (2.42-3.07)        | 2.78 (2.49-3.10)        | <b>3.28 (3.01-3.57)</b> | <b>3.42 (3.10-3.77)</b> |

Note: RR = Risk Ratio; Bold signifies a statistically significant estimate compared to the 1991-1996 period.

**Supplementary Table S6: Trends in relative socioeconomic inequalities in amenable mortality in Canada (1991-2016)**

|                       | 1991-1996        | 1996-2001               | 2001-2006               | 2006-2011               | 2011-2016               |
|-----------------------|------------------|-------------------------|-------------------------|-------------------------|-------------------------|
|                       | RR (95% CI)      | RR (95% CI)             | RR (95% CI)             | RR (95% CI)             | RR (95% CI)             |
| <b>Men</b>            |                  |                         |                         |                         |                         |
| Income                |                  |                         |                         |                         |                         |
| Q5 (Top)              | Ref.             | Ref.                    | Ref.                    | Ref.                    | Ref.                    |
| Q4                    | 1.25 (1.14-1.36) | 1.24 (1.13-1.36)        | 1.19 (1.07-1.31)        | 1.21 (1.10-1.32)        | 1.38 (1.23-1.54)        |
| Q3                    | 1.35 (1.24-1.46) | 1.39 (1.27-1.51)        | 1.40 (1.27-1.55)        | 1.41 (1.29-1.53)        | <b>1.51 (1.36-1.68)</b> |
| Q2                    | 1.51 (1.39-1.63) | <b>1.70 (1.57-1.85)</b> | <b>1.71 (1.56-1.87)</b> | <b>1.66 (1.53-1.81)</b> | <b>1.89 (1.71-2.09)</b> |
| Q1 (Bottom)           | 1.97 (1.83-2.13) | <b>2.28 (2.11-2.47)</b> | <b>2.48 (2.27-2.71)</b> | <b>2.62 (2.42-2.83)</b> | <b>3.02 (2.74-3.33)</b> |
| Education             |                  |                         |                         |                         |                         |
| Postsecondary Degree  | Ref.             | Ref.                    | Ref.                    | Ref.                    | Ref.                    |
| Some Postsecondary    | 1.62 (1.46-1.78) | 1.49 (1.36-1.64)        | 1.56 (1.42-1.72)        | 1.71 (1.59-1.85)        | 1.61 (1.46-1.76)        |
| High School Degree    | 1.67 (1.50-1.85) | 1.64 (1.48-1.82)        | 1.70 (1.54-1.88)        | <b>1.99 (1.83-2.16)</b> | <b>2.03 (1.83-2.24)</b> |
| Less than High School | 2.05 (1.87-2.25) | 2.08 (1.90-2.27)        | 2.21 (2.02-2.41)        | <b>2.43 (2.24-2.63)</b> | <b>2.42 (2.19-2.67)</b> |
| <b>Women</b>          |                  |                         |                         |                         |                         |
| Income                |                  |                         |                         |                         |                         |
| Q5 (Top)              | Ref.             | Ref.                    | Ref.                    | Ref.                    | Ref.                    |
| Q4                    | 1.09 (0.98-1.21) | 1.08 (0.98-1.19)        | 1.11 (1.00-1.24)        | 1.17 (1.06-1.29)        | 1.20 (1.07-1.35)        |
| Q3                    | 1.14 (1.03-1.27) | 1.18 (1.07-1.29)        | <b>1.28 (1.15-1.42)</b> | <b>1.37 (1.25-1.51)</b> | 1.22 (1.10-1.36)        |
| Q2                    | 1.27 (1.15-1.39) | 1.13 (1.03-1.23)        | 1.28 (1.16-1.42)        | <b>1.44 (1.32-1.58)</b> | <b>1.54 (1.39-1.71)</b> |
| Q1 (Bottom)           | 1.56 (1.43-1.70) | 1.49 (1.36-1.62)        | <b>1.74 (1.59-1.91)</b> | <b>2.05 (1.89-2.23)</b> | <b>2.11 (1.91-2.33)</b> |
| Education             |                  |                         |                         |                         |                         |
| Postsecondary Degree  | Ref.             | Ref.                    | Ref.                    | Ref.                    | Ref.                    |
| Some Postsecondary    | 1.22 (1.07-1.39) | 1.19 (1.06-1.33)        | 1.24 (1.11-1.37)        | 1.27 (1.17-1.38)        | 1.28 (1.16-1.41)        |
| High School Degree    | 1.34 (1.18-1.53) | 1.36 (1.21-1.53)        | 1.38 (1.23-1.53)        | 1.43 (1.32-1.56)        | <b>1.55 (1.41-1.72)</b> |
| Less than High School | 1.59 (1.41-1.79) | 1.64 (1.47-1.83)        | 1.70 (1.54-1.89)        | <b>1.82 (1.67-1.99)</b> | <b>1.86 (1.67-2.07)</b> |

Note: RR = Risk Ratio; Bold signifies a statistically significant estimate compared to the 1991-1996 period.
